# Supplementary material for: Direct SVUV-PIMS identification of unstable oxygenated intermediates in ethanol to butadiene reaction
Source: Royal Society of Chemistry journal article supplement (doi:10.1039/d1cy02102h), 2022-01-01
Supplement: d1cy02102h1.pdf [file d1cy02102h1.pdf]

Electronic Supplementary Information

## **Direct SVUV-PIMS Identification of Unstable Oxygenated Intermediates in Ethanol to Butadiene Reaction**

Yishan Yang<sup>‡</sup>, Xuan Guo<sup>‡</sup>, Yang Pan and Yunming Fang\*

1 National Energy R&D Research Center for Biorefinery, Department of Chemical Engineering, Beijing  
University of Chemical Technology, Beijing 100029, China

2 National Synchrotron Radiation Laboratory, University of Science and Technology of China, Anhui  
230029, China

\*E-mail: [fangym@mail.buct.edu.cn](mailto:fangym@mail.buct.edu.cn)

---

### **Catalysts synthesis:**

Preparation of the MgO-SiO<sub>2</sub> (4:1 MgO/SiO<sub>2</sub> molar ratio) catalyst was shown as an example. First, 25.6 g of Mg(NO)<sub>3</sub>•6H<sub>2</sub>O was dissolved in 50 g of ethanol with continuously stirring, and then 1.5 g of silica gel was added into the aforesaid solution. The mixture was stirred at 60 °C until ethanol was totally evaporated and a semitransparent gel was formed. It was then calcined in a muffle furnace at a temperature of 500 °C for 3 h at a rate of 5 °C/min. The same procedure was used to prepare the single component catalyst. All chemicals were purchased from Aladdin and used as received without further purification.

### **Catalyst characterization:**

The basicity of the catalyst was determined by CO<sub>2</sub>-temperature-programmed desorption (CO<sub>2</sub>-TPD) on a Micromeritics Autochem II 2920 apparatus. 120 mg catalyst was charged in a U-shaped fixed-bed quartz microreactor. First pre-treatment under He at 300 °C for 2 h, then cooled to room temperature, pre-adsorption for 1 h at 10% CO<sub>2</sub>/He, switching to He gas for removing physically absorption CO<sub>2</sub> for 1 h, and finally raising the temperature to 700 °C to induce desorption of CO<sub>2</sub>.

X-ray diffraction (XRD) was carried out using a Rigaku Ultima IV X-ray diffractometer with Cu K<sub>α</sub> radiation at 40kV. The data was recorded from 5° to 90° with a scanning speed of 10°/min.

The morphology of the prepared catalysts was obtained via scanning electron microscope (SEM) (HITACHI S-4700). Transmission electron microscope (TEM) (FEI Tecnai G2 F30) with energy-dispersive X-ray spectroscopy was also employed for imaging and elemental mapping.

### **Reaction studies:**

All experiments were performed in a quartz reactor. 1 g 20-40 mesh catalyst was charged into the quartz reactor, heated under 10 standard cubic centimeter per minute (SCCM) nitrogen flow at 10 °C/min to 400 °C for 1 h on the stream. Then cooled to room temperature.

To protect the analytical system, most of the product gas was removed through a pump. So, the reaction pressure was less than atmospheric pressure. A very small amount of the product gas was ionized by vacuum ultraviolet light in the ionization chamber and entered the time-of-flight mass spectrum. The rest was pumped out of the reaction system. The vacuum ultraviolet was set as 11.0 eV if no extra mention, which was greater than the ionization energy of the main product and intermediate molecules, but less than that of the carrier gas (CO<sub>2</sub> and N<sub>2</sub>). Spectra were collected every 60 seconds. The detected substances were determined by molecular weight and ionization energy. Molecular weight was

---

calculated by time of flight and corrected by certain substances. In the photoionization efficiency (PIE) experiment, when the light energy exceeded the ionization energy (IE) of the object to be detected, the signal strength would have a sharp inflection point. The database was obtained from the Center for NSRL Photoionization Mass Spectrometry.

For converting ethanol, the MgO-SiO<sub>2</sub> catalyst was employed. After the catalyst was pretreated, ethanol was introduced into the reactor by bubbling at room temperature. The carrier gas was nitrogen, at a flow rate of 10 SCCM. After the bubble was stabilized, the temperature was set at a constant temperature. After the system was stable, the mass spectrum signal was recorded.

CO<sub>2</sub> gas was employed to poison the active sites of the MgO-SiO<sub>2</sub> catalyst. An ethanol conversion experiment was carried out under the above conditions at a constant temperature. When stabilization, carrier gas was changed from N<sub>2</sub> to CO<sub>2</sub> with the same flow rate (10 SCCM). After lasting more than 30 minutes, CO<sub>2</sub> was replaced by N<sub>2</sub>. Data were recorded throughout the whole proceeding.

When acetaldehyde was feeding, bubbling was in an ice bath. The carrier gas was nitrogen, at a flow rate of 10 SCCM. After the bubble was stabilized, the temperature was programmed to rise at a rate of 5 °C/min from 50 °C. The MgO-SiO<sub>2</sub> catalyst, single component MgO, and SiO<sub>2</sub> were employed as a contrast.

Photoionization efficiency (PIE) experiment was carried out as follows. After the MgO-SiO<sub>2</sub> catalyst was pretreated according to the above method, the reaction temperature was maintained at a constant temperature. Acetaldehyde was introduced into the reactor by bubbling in an ice bath. The carrier gas was nitrogen, at a flow rate of 10 SCCM. After the bubble and temperature were stabilized, the energy of SVUV was set to increase at a certain step (0.01eV) per minute from 9.58 eV to 9.78 eV.

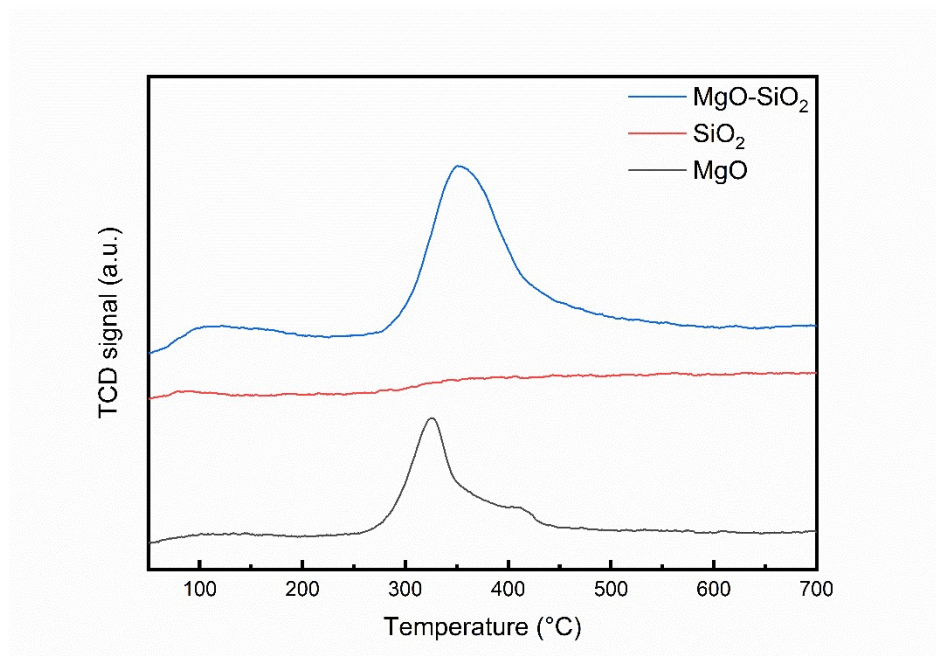

**Figure S1.** CO<sub>2</sub>-TPD profiles for different catalysts.

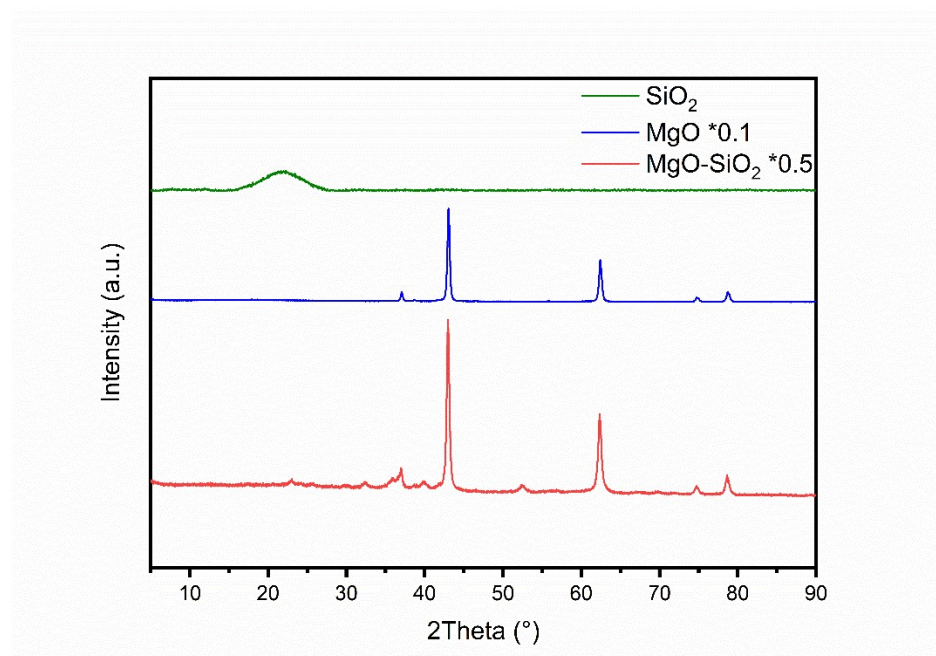

**Figure S2.** XRD patterns of different catalysts.

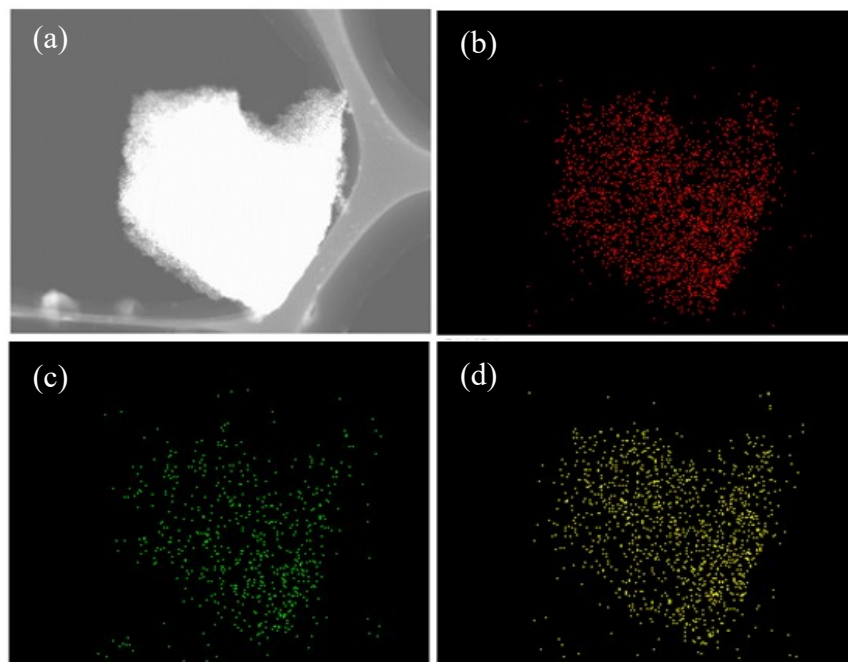

**Figure S3.** Images of MgO-SiO<sub>2</sub> (3:7 MgO/SiO<sub>2</sub> molar ratio) catalyst: (a) TEM; (b) EDX mapping -Si channel; (c) EDX mapping -Mg channel; (d) EDX mapping -O channel.

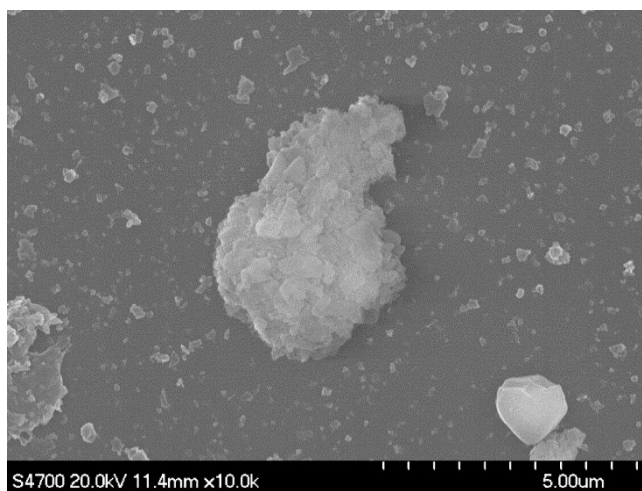

**Figure S4.** SEM image of MgO-SiO<sub>2</sub> catalyst.

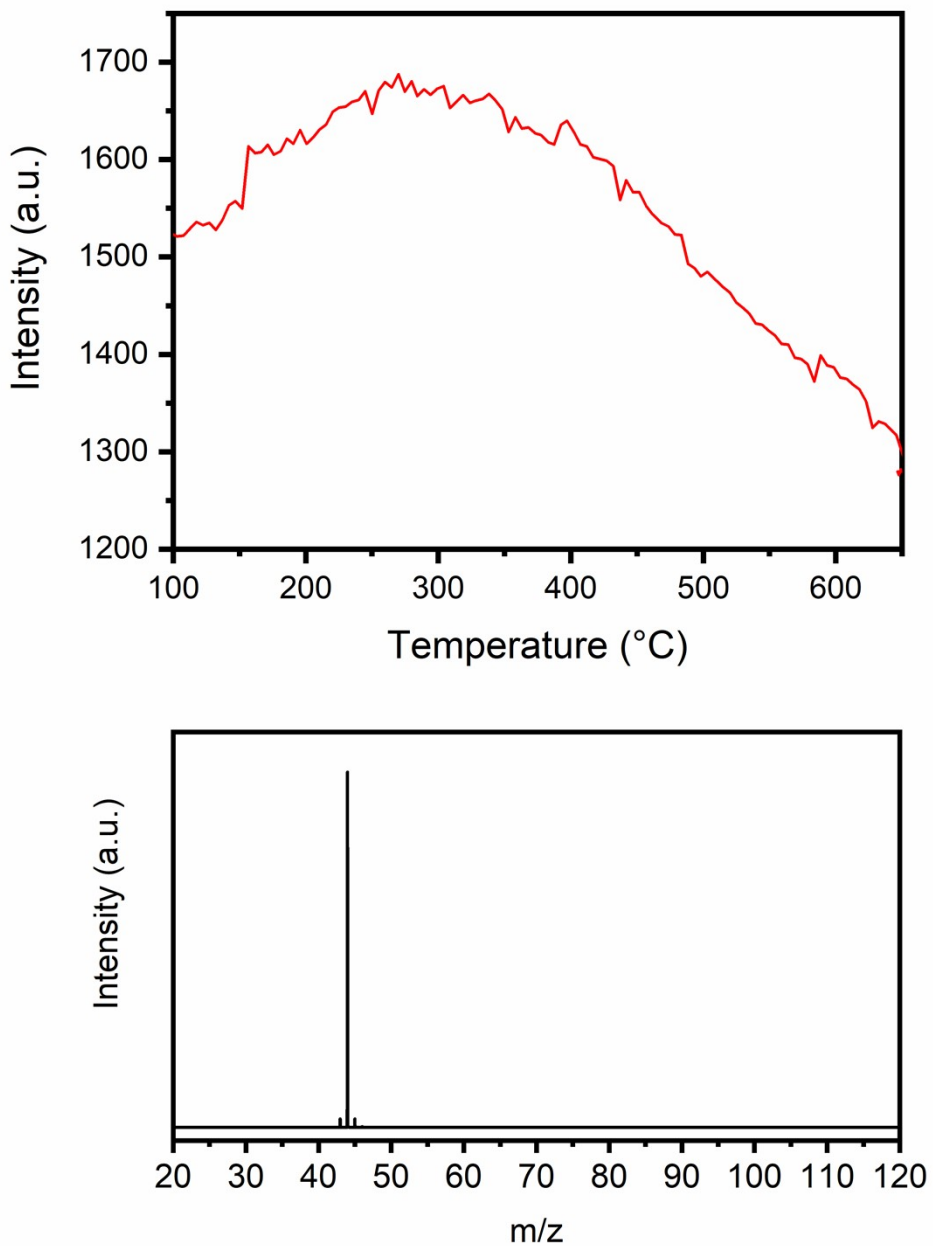

**Figure S5.** (a): Temperature-programmed reaction profiles of converting acetaldehyde in the absence of catalysts. Reaction conditions: bubbling in an ice bath, 10 SCCM N<sub>2</sub> as the carrier gas, a heating rate of 10 °C/min. (b): Single mass spectrum at 450°C in the absence of catalysts. Reaction conditions: bubbling at ice bath, 10 SCCM N<sub>2</sub> as carrier gas.



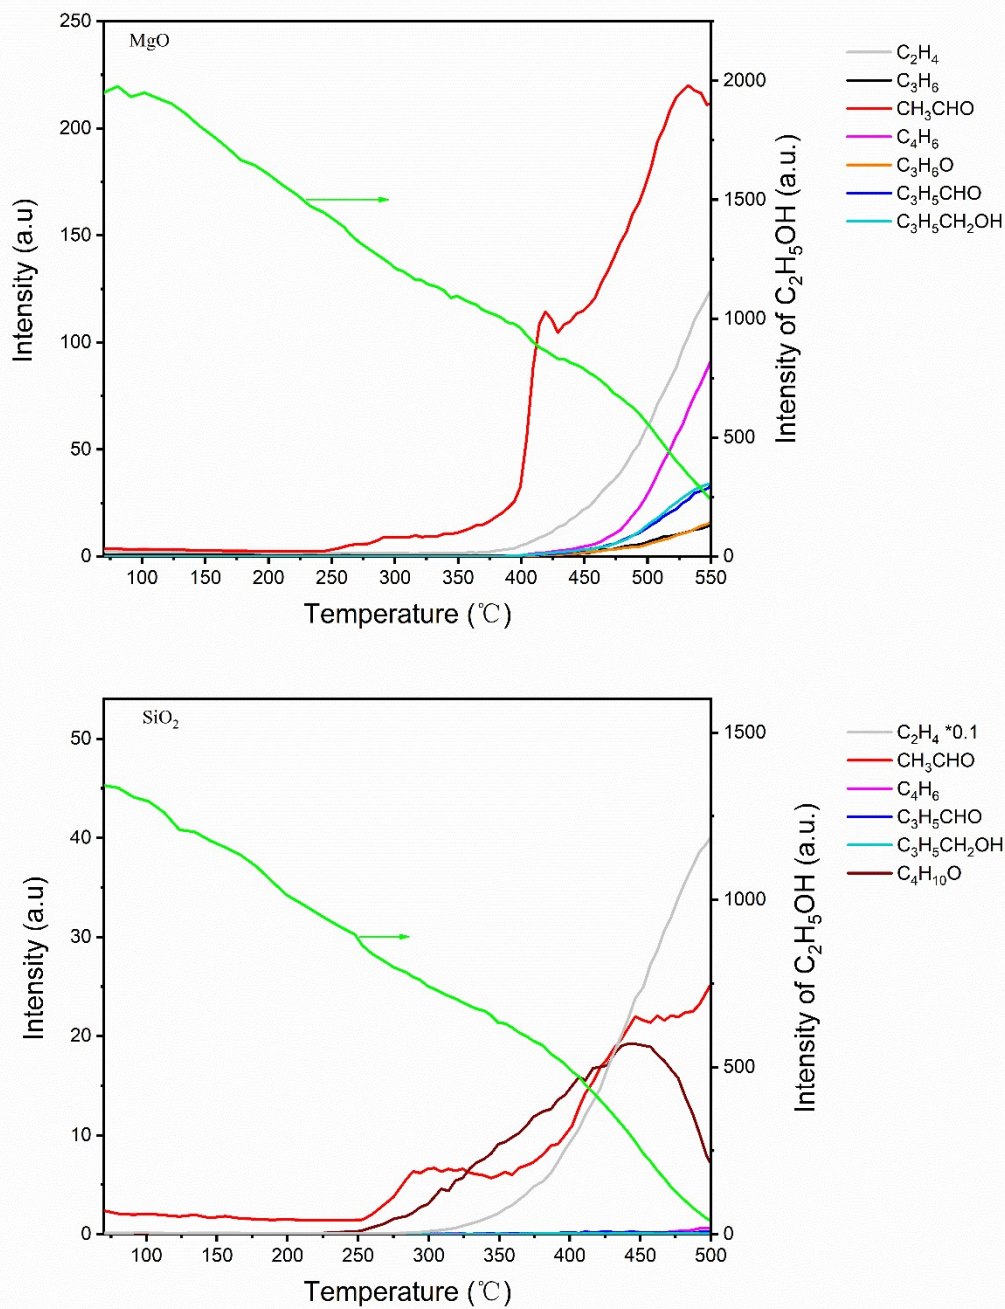

**Figure S6.** Temperature-programmed reaction profiles of converting ethanol over MgO and SiO<sub>2</sub> catalysts. Reaction conditions: bubbling at room temperature, 10 SCCM N<sub>2</sub> as a carrier gas, a heating rate of 10 °C/min.

**Table S1.** Main intermediates and products of converting acetaldehyde over MgO-SiO<sub>2</sub> catalyst. Reaction conditions: 450 °C, bubbling in an ice bath, 10 SCCM N<sub>2</sub> as carrier gas.

| Formula                                        | Molecular weight |                   |
|------------------------------------------------|------------------|-------------------|
|                                                | Calculated value | Theoretical value |
| <b>C<sub>2</sub>H<sub>4</sub></b>              | 28.029           | 28.031            |
| <b>C<sub>2</sub>H<sub>6</sub>O</b>             | 46.039           | 46.041            |
| <b>C<sub>3</sub>H<sub>6</sub>O</b>             | 58.035           | 58.041            |
| <b>C<sub>2</sub>H<sub>4</sub>O<sub>2</sub></b> | 60.006           | 60.020            |
| <b>C<sub>4</sub>H<sub>6</sub>O</b>             | 70.041           | 70.041            |
| <b>C<sub>4</sub>H<sub>8</sub>O</b>             | 72.058           | 72.056            |
| <b>C<sub>6</sub>H<sub>6</sub></b>              | 78.049           | 78.046            |
| <b>C<sub>4</sub>H<sub>8</sub>O<sub>2</sub></b> | 88.076           | 88.052            |
| <b>C<sub>7</sub>H<sub>8</sub></b>              | 92.075           | 92.062            |
| <b>C<sub>6</sub>H<sub>8</sub>O</b>             | 96.079           | 96.057            |
| <b>C<sub>8</sub>H<sub>14</sub></b>             | 110.091          | 110.109           |
| <b>C<sub>9</sub>H<sub>12</sub></b>             | 120.091          | 120.093           |
| <b>C<sub>8</sub>H<sub>10</sub>O</b>            | 122.096          | 122.073           |



**Scheme S1:** The generally accepted reaction mechanism of the ethanol to butadiene

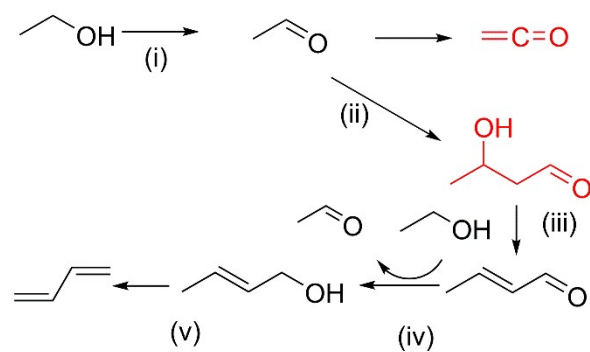

conversion and ketene intermediate.
